# Supplementary material
Source: publisher figshare collection journal article supplement (https://sage.figshare.com/ndownloader/files/21327795)
Supplement: Supplementary file 1 [file 21327795]

# Online supplementary material for

# Testing the automaticity of an attentional bias towards predictive cues in human associative learning

# David Luque, Sara Molinero, Mina Jevtović & Tom Beesley

# Online supplementary material #1. Instructions

**Experiment 1.** *Beginning of the experiment:*


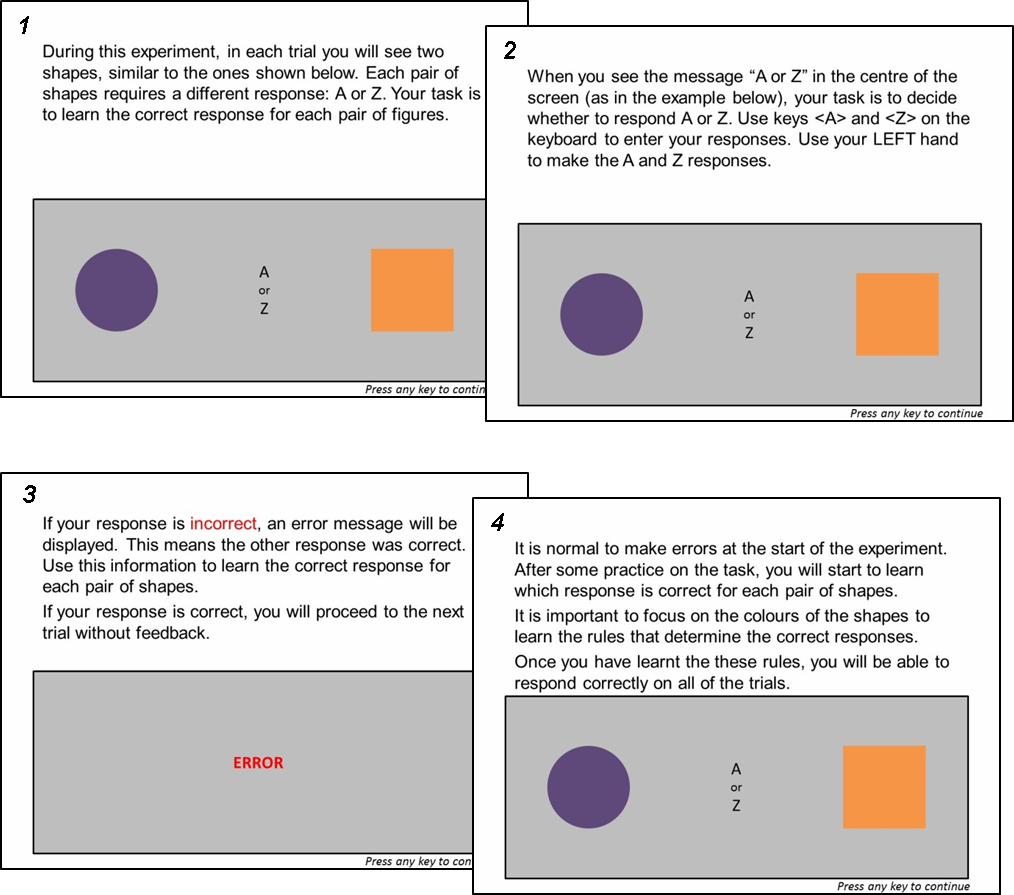


*Between Phase 1 and 2:*


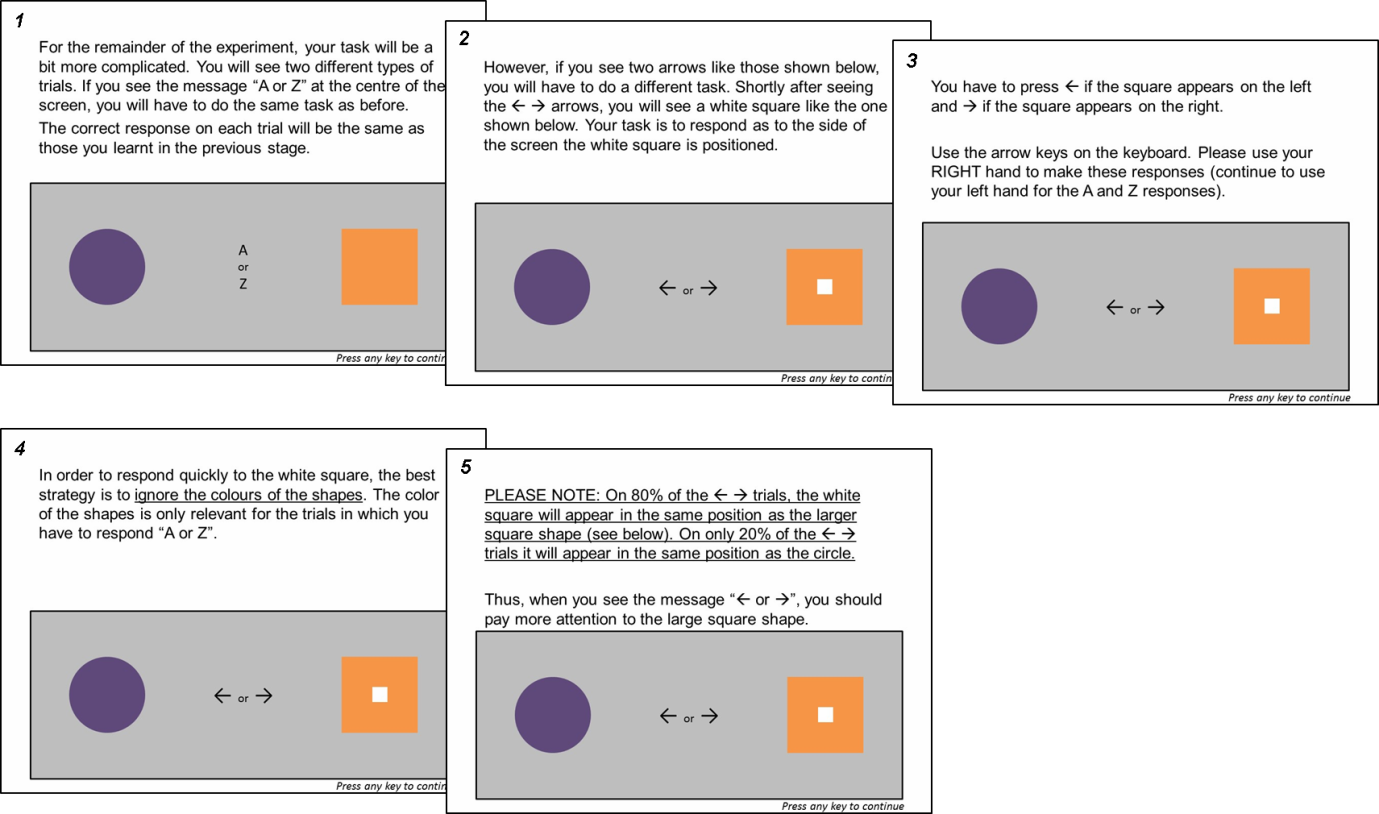


# Experiment 2

*Beginning of the experiment:* The same as in Experiment 1.

*Between Phase 1 and 2*


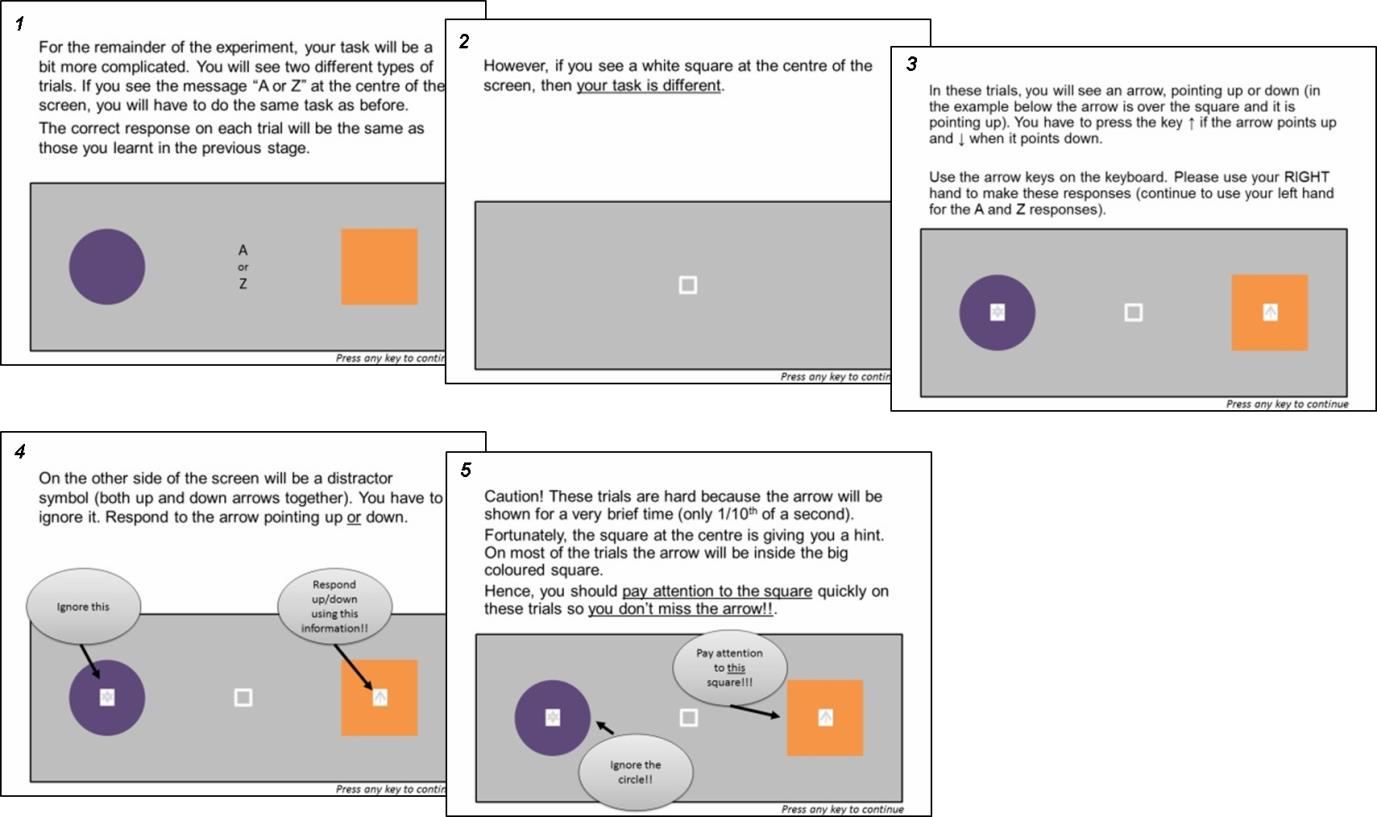


# Experiment 3

# All instructions were the same as in Experiment 2.
